# Supplementary material
Source: publisher figshare collection journal article supplement (https://diabetesjournals.figshare.com/ndownloader/files/24084245)
Supplement: Supplementary file 1 [file 24084245]

| **Supplementary Table 1** ICD-9-CM, ICD-10-CM and CPT classification of non-traumatic lower-extremity amputations (NLEA) | | | |
| --- | --- | --- | --- |
| **Level of NLEA** | **ICD-9 code** | **ICD-10 code** | **CPT codes** |
| Toe | 84.11 | 0Y6P – 0Y6Y | 28810, 28820, 28825 |
| Foot | 84.12, 84.13 | 0Y6M – 0Y6N | 28800, 28805 |
|  |  |
| Below the knee amputation (BKA) | 84.14, 84.15, 84.16 | 0Y6F, 0Y6G, 0Y6H, 0YJ | 27880, 27881, 27882, 27884, 27886, 27888, 27889, 27598 |
| Above the knee amputation (AKA) | 84.17, 84.18, 84.19 | 0Y62, 0Y63, 0Y64, 0Y67, 0Y68, 0Y6C, 0Y6D | 27290, 27295, 27590, 27591, 27592, 27594, 27596 |
| Traumatic amputations (exclusion) | 895, 896, 897 | S78, S88, S98 | None |
| CPT: Current Procedural Terminology; ICD: International Classification of Disease | | | |

| **Supplementary Table 2** Counts of NLEA events and Medicare FFS beneficiaries among people *with diabetes* between 2000 and 2017 by sex, age group, race/ethnicity and NLEA level | | | | | | | |
| --- | --- | --- | --- | --- | --- | --- | --- |
|  | **N (NLEA)/N (Medicare FFS beneficiaries)** | | | | | | |
|  | **2000** | **2003** | **2006** | **2009** | **2012** | **2015** | **2017** |
| Total population | 39,333/4,629,246 | 39,055/5,616,597 | 33,556/6,253,645 | 28,910/6,428,009 | 29,159/6,806,047 | 31,314/6,778,242 | 34,555/6,869,683 |
| Women | 19,395/2,687,922 | 18,361/3,193,611 | 14,952/3,497,407 | 12,304/3,549,448 | 11,811/3,712,688 | 11,554/3,615,755 | 12,151/3,623,745 |
| Men | 19,938/1,941,324 | 20,694/2,422,986 | 18,604/2,756,238 | 16,606/2,878,561 | 17,348/3,093,359 | 19,768/3,162,487 | 22,422/3,245,938 |
| *Race/Ethnicity* |  |  |  |  |  |  |  |
| White | 26,454/3,646,784 | 25,851/4,383,304 | 22,702/4,935,173 | 19,974/5,031,314 | 20,495/5,242,432 | 22,558/5,217,587 | 24,807/5,216,783 |
| Black | 8,510/517,534 | 8,581/636,284 | 7,377/681,789 | 5,740/674,949 | 5,395/741,086 | 5,257/725,476 | 5,456/726,586 |
| Hispanic | 3,553/347,775 | 3,793/435,414 | 2,714/421,853 | 2,476/456,259 | 2,444/502,727 | 2,400/470,069 | 2,850/495,752 |
| API | 306/73,514 | 343/106,428 | 308/143,730 | 265/179,937 | 297/213,062 | 365/217,734 | 452/246,450 |
| Other | 429/35,730 | 436/48,857 | 422/66,034 | 435/81,319 | 503/97,838 | 605/108,980 | 721/117,749 |
| *Age group* |  |  |  |  |  |  |  |
| 67-69 | 5,124/666,354 | 5,388/873,239 | 4,833/987,110 | 4,454/1,010,375 | 4,732/1,074,246 | 6,008/1,200,565 | 6,520/1,160,861 |
| 70-74 | 9,982/1,274,528 | 9,309/1,469,232 | 7,939/1,600,680 | 7,098/1,665,516 | 7,602/1,789,794 | 8,363/1,778,891 | 9,881/1,911,385 |
| 75-79 | 9,905/1,192,520 | 9,616/1,415,437 | 7,988/1,501,309 | 6,378/1,449,161 | 6,297/1,510,495 | 6,810/1,489,457 | 7,595/1,528,824 |
| 80-84 | 7,387/823,855 | 7,762/1,042,382 | 6,673/1,181,625 | 5,517/1,195,528 | 5,220/1,203,140 | 5,065/1,110,120 | 5,409/1,105,857 |
| 85+ | 6,935/671,989 | 6,980/816,307 | 6,123/982,921 | 5,463/1,107,429 | 5,308/1,228,372 | 5,076/1,19,9209 | 5,168/1,162,756 |
| NLEA level |  |  |  |  |  |  |  |
| Toe | 13,340/4,629,246 | 14,072/5,616,597 | 13,527/6,253,645 | 13,212/6,428,009 | 14,364/6,806,047 | 16,380/6,778,242 | 16,612/6,869,683 |
| Foot | 2,530/4,629,246 | 2,468/5,616,597 | 2,277/6,253,645 | 2,115/6,428,009 | 2,314/6,806,047 | 3,142/6,778,242 | 5,982/6,869,683 |
| BKA | 10,822/4,629,246 | 10,249/5,616,597 | 8,082/6,253,645 | 6,121/6,428,009 | 5,808/6,806,047 | 5,917/6,778,242 | 5,955/6,869,683 |
| AKA | 12,641/4,629,246 | 12,266/5,616,597 | 9,670/6,253,645 | 7,462/6,428,009 | 6,673/6,806,047 | 5,875/6,778,242 | 6,006/6,869,683 |
| AKA: Above the knee amputation; API: Asian/Pacific Islander BKA: Below the knee amputation; FFS: fee-for-service; NLEA: Non-traumatic lower extremity amputation. | | | | | | | |

| **Supplementary Table 3** Demographic and comorbidity characteristics§ of the US Medicare FFS population *with diabetes who also had an NLEA* between 2000 and 2017 | | | | | | | | | | | | | | | | | | |  |
| --- | --- | --- | --- | --- | --- | --- | --- | --- | --- | --- | --- | --- | --- | --- | --- | --- | --- | --- | --- |
|  | **2000** | **2001** | **2002** | **2003** | **2004** | **2005** | **2006** | **2007** | **2008** | **2009** | **2010** | **2011** | **2012** | **2013** | **2014** | **2015** | **2016** | **2017** | **APC** |
| N (in 100s) | 39.3 | 40.1 | 39.2 | 39.1 | 38.9 | 36.6 | 33.6 | 31.4 | 29.7 | 28.9 | 28.8 | 29.7 | 29.2 | 30.1 | 31.0 | 31.3 | 33.2 | 34.6 | - |
| Men | 50.7 | 51.0 | 52.4 | 53.0 | 53.6 | 54.8 | 55.4 | 55.7 | 57.0 | 57.4 | 58.5 | 59.2 | 59.5 | 60.9 | 62.3 | 63.1 | 64.1 | 64.9 | 1.6* |
| *Race/Ethnicity* | | | | | | | | | | | | | | | | | | |  |
| White | 67.4 | 66.7 | 66.4 | 66.3 | 66.3 | 66.6 | 67.7 | 68.6 | 69.2 | 69.1 | 68.6 | 70.1 | 70.3 | 71.1 | 72.2 | 72.3 | 72.6 | 72.4 | 0.4* |
| Black | 21.7 | 22.4 | 22.2 | 22.0 | 22.0 | 22.1 | 22.0 | 20.8 | 20.2 | 19.9 | 19.9 | 18.9 | 18.5 | 18.1 | 16.9 | 16.9 | 16.3 | 15.9 | -1.6* |
| Hispanic | 9.1 | 9.2 | 9.5 | 9.7 | 9.6 | 9.2 | 8.1 | 8.3 | 8.3 | 8.6 | 8.9 | 8.5 | 8.4 | 7.9 | 8.0 | 7.7 | 8.0 | 8.3 | -0.5* |
| API | 0.8 | 0.7 | 0.8 | 0.9 | 0.9 | 0.9 | 0.9 | 1.0 | 1.0 | 0.9 | 1.0 | 1.0 | 1.0 | 1.1 | 1.1 | 1.2 | 1.2 | 1.3 | 4.1* |
| Other | 1.1 | 1.0 | 1.1 | 1.1 | 1.2 | 1.2 | 1.3 | 1.3 | 1.4 | 1.5 | 1.6 | 1.5 | 1.7 | 1.7 | 1.7 | 1.9 | 1.9 | 2.1 | 5.4* |
| *Age group* |  |  |  |  |  |  |  |  |  |  |  |  |  |  |  |  |  |  |  |
| 67-69 | 13.0 | 13.4 | 13.4 | 13.8 | 14.5 | 14.3 | 14.4 | 14.6 | 14.4 | 15.4 | 16.5 | 16.5 | 16.2 | 16.9 | 17.9 | 19.2 | 19.8 | 18.9 | 2.6* |
| 70-74 | 25.4 | 24.6 | 24.3 | 23.8 | 23.6 | 23.8 | 23.7 | 23.6 | 24.3 | 24.6 | 24.7 | 25.1 | 26.1 | 26.4 | 26.5 | 26.7 | 27.1 | 28.6 | 0.7* |
| 75-79 | 25.2 | 25.0 | 25.2 | 24.6 | 24.4 | 24.2 | 23.8 | 23.0 | 22.2 | 22.1 | 21.5 | 21.4 | 21.6 | 21.8 | 22.2 | 21.7 | 22.0 | 22.0 | -0.8* |
| 80-84 | 18.8 | 19.4 | 19.6 | 19.9 | 19.7 | 19.9 | 19.9 | 19.8 | 19.9 | 19.1 | 18.8 | 18.6 | 17.9 | 17.4 | 16.4 | 16.2 | 15.6 | 15.6 | -1* |
| 85+ | 17.6 | 17.5 | 17.5 | 17.9 | 17.8 | 17.8 | 18.2 | 19.0 | 19.3 | 18.9 | 18.5 | 18.3 | 18.2 | 17.6 | 17.1 | 16.2 | 15.6 | 14.9 | -0.9* |
| *NLEA level* |  |  |  |  |  |  |  |  |  |  |  |  |  |  |  |  |  |  |  |
| Toe | 33.9 | 34.5 | 35.2 | 36.0 | 36.8 | 38.2 | 40.3 | 41.6 | 43.6 | 45.7 | 46.9 | 48.3 | 49.3 | 50.9 | 52.2 | 52.3 | 49.8 | 48.1 | 2.5* |
| Foot | 6.4 | 6.4 | 6.2 | 6.3 | 6.5 | 6.5 | 6.8 | 7.1 | 7.1 | 7.3 | 7.8 | 7.6 | 7.9 | 8.1 | 8.4 | 10.0 | 14.6 | 17.3 | 9.9* |
| BKA | 27.5 | 27.4 | 26.9 | 26.2 | 25.6 | 24.9 | 24.1 | 23.0 | 22.5 | 21.2 | 21.2 | 20.4 | 19.9 | 19.5 | 19.4 | 18.9 | 17.8 | 17.2 | -2.2* |
| AKA | 32.1 | 31.7 | 31.8 | 31.4 | 31.0 | 30.3 | 28.8 | 28.3 | 26.9 | 25.8 | 24.1 | 23.7 | 22.9 | 21.5 | 20.0 | 18.8 | 17.9 | 17.4 | -2.7* |
| *Comorbidities* | | | | | | | | | | | | | | | | | | |  |
| Liver | 4.3 | 4.6 | 4.8 | 4.9 | 4.9 | 5.3 | 4.9 | 5.2 | 5.5 | 6.0 | 6.5 | 7.5 | 7.9 | 7.9 | 7.9 | 8.9 | 9.8 | 10.2 | 8.1* |
| PVD | 86.9 | 87.4 | 87.4 | 88.2 | 88.2 | 88.2 | 87.8 | 87.5 | 87.1 | 86.7 | 86.4 | 87.5 | 86.9 | 86.1 | 85.4 | 86.5 | 87.6 | 87.9 | 0.1* |
| AMI | 5.8 | 6.1 | 6.4 | 6.5 | 6.1 | 5.8 | 5.9 | 6.0 | 6.5 | 6.2 | 6.2 | 6.3 | 6.2 | 5.8 | 5.3 | 5.7 | 6.0 | 6.4 | 0.7* |
| CKD | 44.5 | 46.9 | 49.1 | 51.6 | 54.4 | 57.4 | 62.9 | 65.0 | 65.7 | 67.7 | 69.2 | 71.1 | 72.5 | 72.4 | 73.3 | 77.8 | 85.9 | 87.7 | 5.7* |
| COPD | 26.2 | 26.7 | 28.1 | 28.8 | 29.8 | 31.1 | 31.4 | 31.8 | 29.1 | 29.3 | 29.3 | 33.2 | 32.9 | 32.4 | 31.5 | 32.1 | 32.3 | 31.7 | 1.2* |
| Hypertension | 84.3 | 86.3 | 87.9 | 89.9 | 91.5 | 92.7 | 93.9 | 93.8 | 94.8 | 95.2 | 95.8 | 96.7 | 96.8 | 96.9 | 96.8 | 97.1 | 97.1 | 97.2 | 0.9* |
| Stroke | 19.7 | 20.2 | 19.4 | 19.0 | 18.6 | 18.0 | 17.4 | 17.5 | 16.8 | 16.1 | 15.7 | 15.0 | 14.6 | 14.0 | 13.9 | 13.5 | 13.0 | 13.3 | -1.9* |
| IHD | 76.6 | 77.3 | 77.1 | 78.4 | 78.9 | 78.8 | 79.6 | 79.1 | 79.1 | 78.9 | 78.7 | 79.1 | 78.9 | 77.7 | 76.9 | 76.2 | 75.2 | 75.4 | -0.1* |
| Cancer | 8.5 | 8.8 | 8.8 | 9.1 | 8.9 | 9.0 | 9.2 | 8.7 | 9.4 | 9.3 | 9.3 | 12.3 | 12.2 | 12.0 | 11.5 | 12.2 | 12.1 | 11.9 | 2.3* |
| Obesity | 6.5 | 6.8 | 7.6 | 8.0 | 8.9 | 9.5 | 10.1 | 10.2 | 11.7 | 13.5 | 15.1 | 21.6 | 26.6 | 28.3 | 30.1 | 32.9 | 36.6 | 39.8 | 30.2* |
| Depression | 22.3 | 23.5 | 24.2 | 25.2 | 25.7 | 25.5 | 26.1 | 26.9 | 27.9 | 28.9 | 30.0 | 35.8 | 36.0 | 36.0 | 36.4 | 37.4 | 39.1 | 39.6 | 4.6* |
| Hyperlipidemia | 24.1 | 28.1 | 32.6 | 37.4 | 43.0 | 47.7 | 51.5 | 55.2 | 58.7 | 62.3 | 65.2 | 75.7 | 77.8 | 78.9 | 80.6 | 81.9 | 82.4 | 84.6 | 14.7* |
| §Data are presented as percentages. *p<0.05. AMI: Acute Myocardial Infarction; APC: Annual Percentage Change (2000-2017); API: Asian/Pacific Islander; AKD: Chronic Kidney Disease; COPD chronic obstructive pulmonary disease; FFS: fee-for-service; IHD: Ischemic Heart Disease; PVD: Peripheral Vascular Disease | | | | | | | | | | | | | | | | | | | |

| **Supplementary Table 4** Trends in NLEA rates among US Medicare FFS beneficiaries *with diabetes* between 2000 and 2017 by sex, age group, race/ethnicity and NLEA level | | | | | | | | | | | | | |
| --- | --- | --- | --- | --- | --- | --- | --- | --- | --- | --- | --- | --- | --- |
|  | **Annual NLEA rate (per 1,000 people with diabetes)** | | | | | | | **Trend 1** | | **Trend 2** | | **Trend 3** | |
|  | **2000** | **2003** | **2006** | **2009** | **2012** | **2015** | **2017** | **Year** | **APC** | **Year** | **APC** | **Year** | **APC** |
| Total | 8.5 | 6.9 | 5.3 | 4.4 | 4.1 | 4.4 | 4.8 | 2000-2009 | -7.9* | 2009-2017 | 1.2* | NA | NA |
| *Sex* |  |  |  |  |  |  |  |  |  |  |  |  |  |
| Women | 7.2 | 5.7 | 4.2 | 3.4 | 3.1 | 3.2 | 3.4 | 2000-2008 | -8.7* | 2008-2012 | -3.5 | 2012-2017 | 1.3 |
| Men | 10.4 | 8.7 | 6.8 | 5.8 | 5.6 | 6.2 | 6.9 | 2000-2008 | -7.1* | 2008-2012 | -1.5 | 2012-2017 | 4* |
| *Age group* |  |  |  |  |  |  |  |  |  |  |  |  |  |
| 67-69 | 7.4 | 5.9 | 4.6 | 4.1 | 4.1 | 4.7 | 5.2 | 2000-2008 | -7.4* | 2008-2012 | 0.6 | 2012-2017 | 4.4* |
| 70-74 | 7.6 | 6.1 | 4.7 | 4.0 | 4.0 | 4.4 | 4.8 | 2000-2008 | -7.7* | 2008-2012 | -0.8 | 2012-2017 | 3.6* |
| 75-79 | 8.2 | 6.7 | 5.2 | 4.2 | 4.0 | 4.3 | 4.6 | 2000-2009 | -7.6* | 2009-2012 | -1.3 | 2012-2017 | 3.1* |
| 80-84 | 9.0 | 7.4 | 5.6 | 4.5 | 4.2 | 4.4 | 4.6 | 2000-2009 | -7.8* | 2009-2012 | -0.8 | 2012-2017 | 2.5 |
| 85+ | 10.6 | 8.8 | 6.4 | 5.0 | 4.4 | 4.3 | 4.5 | 2000-2003 | -6.5* | 2003-2010 | -8.9* | 2010-2017 | -0.7 |
| *Race/ethnicity* |  |  |  |  |  |  |  |  |  |  |  |  |  |
| White | 7.1 | 5.7 | 4.4 | 3.8 | 3.7 | 4.1 | 4.4 | 2000-2008 | -7.6* | 2008-2012 | -0.8 | 2012-2017 | 3.5* |
| Black | 17.4 | 14.2 | 11.4 | 8.8 | 7.5 | 7.4 | 7.6 | 2000-2012 | -7.2* | 2012-2017 | 0.7 | NA | NA |
| Hispanic | 10.5 | 9.0 | 6.5 | 5.4 | 4.8 | 5.0 | 5.6 | 2000-2008 | -7.9* | 2008-2013 | -4.1* | 2013-2017 | 4.4* |
| API | 4.4 | 3.3 | 2.2 | 1.4 | 1.4 | 1.6 | 1.8 | 2000-2010 | -11.2* | 2010-2017 | 3.6* | NA | NA |
| Other | 12.4 | 9.1 | 6.4 | 5.5 | 5.1 | 5.2 | 5.8 | 2000-2008 | -10.1* | 2008-2014 | -2.0 | 2014-2017 | 5.6 |
| *NLEA level* |  |  |  |  |  |  |  |  |  |  |  |  |  |
| Toe | 2.8 | 2.5 | 2.1 | 2.0 | 2.0 | 2.3 | 2.3 | 2000-2008 | -4.8* | 2008-2017 | 2.2* | NA | NA |
| Foot | 0.5 | 0.4 | 0.4 | 0.3 | 0.3 | 0.4 | 0.8 | 2000-2008 | -6.5* | 2008-2014 | 1.8 | 2014-2017 | 33.9* |
| BKA | 2.3 | 1.8 | 1.3 | 0.9 | 0.8 | 0.8 | 0.8 | 2000-2003 | -8.3* | 2003-2009 | -11.1* | 2009-2017 | -1.5* |
| AKA | 2.8 | 2.2 | 1.5 | 1.1 | 1.0 | 0.8 | 0.8 | 2000-2004 | -7.8* | 2004-2009 | -11.8* | 2009-2017 | -3.7* |
| AKA: Above the knee amputation; APC: Annual percent change; API: Asian/Pacific Islander BKA: Below the knee amputation; FFS: fee-for-service; NA: No second or third trend identified; NLEA: Non-traumatic lower extremity amputation. *APC trend significant at p-value<0.05 | | | | | | | | | | | | | |

| **Supplementary Table 5** Trends in NLEA rates among US Medicare FFS beneficiaries *without diabetes* between 2000 and 2017 by sex, age group, race/ethnicity and NLEA level | | | | | | | | | | | | | |
| --- | --- | --- | --- | --- | --- | --- | --- | --- | --- | --- | --- | --- | --- |
|  | **Annual NLEA rate (per 1,000 people without diabetes)** | | | | | | | **Trend 1** |  | **Trend 2** |  | **Trend 3** |  |
|  | **2000** | **2003** | **2006** | **2009** | **2012** | **2015** | **2017** | **Year** | **APC** | **Year** | **APC** | **Year** | **APC** |
| Overall | 0.9 | 0.8 | 0.7 | 0.6 | 0.6 | 0.6 | 0.7 | 2000-2008 | -4.8* | 2008-2017 | 0.7* | NA | NA |
| *Sex* | | | | | | | | | | | | | |
| Women | 0.8 | 0.7 | 0.6 | 0.6 | 0.6 | 0.6 | 0.6 | 2000-2007 | -4.9* | 2007-2017 | 0.0 | NA | NA |
| Men | 1.1 | 0.9 | 0.8 | 0.7 | 0.7 | 0.7 | 0.8 | 2000-2008 | -5.4* | 2008-2017 | 1.1 | NA | NA |
| *Age group* | | | | | | | | | | | | | |
| 67-69 | 0.4 | 0.4 | 0.3 | 0.3 | 0.4 | 0.3 | 0.4 | 2000-2006 | -3.9* | 2006-2017 | 1.1* | NA | NA |
| 70-74 | 0.5 | 0.5 | 0.4 | 0.4 | 0.4 | 0.4 | 0.5 | 2000-2008 | -3.7* | 2008-2017 | 2.1* | NA | NA |
| 75-79 | 0.8 | 0.7 | 0.6 | 0.6 | 0.6 | 0.6 | 0.7 | 2000-2008 | -3.6* | 2008-2017 | 1.7* | NA | NA |
| 80-84 | 1.2 | 1.0 | 0.9 | 0.8 | 0.8 | 0.9 | 0.9 | 2000-2008 | -5.2* | 2008-2017 | 0.8* | NA | NA |
| 85+ | 2.0 | 1.6 | 1.3 | 1.1 | 1.0 | 1.0 | 1.0 | 2000-2008 | -6.8* | 2008-2017 | -1.8* | NA | NA |
| *Race/ethnicity* | | | | | | | | | | | | | |
| White | 0.8 | 0.7 | 0.6 | 0.6 | 0.6 | 0.6 | 0.7 | 2000-2007 | -4.1* | 2007-2017 | 1.0* | NA | NA |
| Black | 2.7 | 2.0 | 1.6 | 1.3 | 1.1 | 1.0 | 0.9 | 2000-2009 | -8.5* | 2009-2017 | -4.0* | NA | NA |
| Hispanic | 0.8 | 0.6 | 0.5 | 0.4 | 0.4 | 0.3 | 0.3 | 2000-2009 | -7.8* | 2009-2017 | -1.6 | NA |  |
| API | 0.4 | 0.3 | 0.3 | 0.2 | 0.2 | 0.2 | 0.2 | 2000-2005 | -10.6* | 2005-2017 | -0.2* | NA | NA |
| Other | 1.0 | 0.6 | 0.6 | 0.5 | 0.5 | 0.5 | 0.6 | 2000-2008 | -8.2* | 2008-2017 | 1.5 | NA | NA |
| *NLEA level* | | | | | | | | | | | | | |
| Toe | 0.3 | 0.3 | 0.3 | 0.3 | 0.4 | 0.4 | 0.4 | 2000-2007 | 0.6 | 2007-2017 | 2.8* | NA | NA |
| Foot | 0.0 | 0.0 | 0.0 | 0.0 | 0.0 | 0.0 | 0.0 | 2000-2007 | -5.7* | 2007-2014 | 0.8 | 2014-2017 | 24.6* |
| BKA | 0.2 | 0.1 | 0.1 | 0.1 | 0.1 | 0.1 | 0.1 | 2000-2008 | -8.6* | 2008-2017 | -3.1* | NA | NA |
| AKA | 0.4 | 0.3 | 0.2 | 0.2 | 0.2 | 0.1 | 0.1 | 2000-2009 | -9.0* | 2009-2017 | -3.6* | NA | NA |
| AKA: Above the knee amputation; APC: Annual percent change; API: Asian/Pacific Islander BKA: Below the knee amputation; FFS: fee-for-service; NA: No second or third trend identified; NLEA: Non-traumatic lower extremity amputation. *APC trend significant at p-value<0.05 | | | | | | | | | | | | | |

| **Supplementary Table 6** Counts of NLEA events and Medicare FFS beneficiaries among people *without diabetes* between 2000 and 2017 by sex, age group, race/ethnicity and NLEA level | | | | | | | |
| --- | --- | --- | --- | --- | --- | --- | --- |
|  | **N (NLEA)/ N (Medicare FFS beneficiaries)** | | | | | | |
|  | **2000** | **2003** | **2006** | **2009** | **2012** | **2015** | **2017** |
| Total population | 17,273/18,791,519 | 15353/19,454,174 | 12,673/18,339,833 | 10,849/16,795,316 | 10,503/16,694,614 | 10,594/16,945,193 | 11,237/17,469,632 |
| Women | 9,920/11,453,713 | 8612/11,712,894 | 7,275/10,955,126 | 6,153/9,995,456 | 5,736/9,863,619 | 5,710/9,887,608 | 5,866/10,134,641 |
| Men | 7,353/7,337,806 | 6741/7,741,280 | 5,398/7,384,707 | 4,696/6,799,860 | 4,767/6,830,995 | 4,899/7,057,585 | 5,416/7,334,991 |
| *Race/Ethnicity* |  |  |  |  |  |  |  |
| White | 13,360/16,551,723 | 12,311/17,007,099 | 10,449/1,6084,368 | 9,257/14,679,864 | 9,085/14,498,562 | 9,297/14,652,697 | 9,946/14,944,822 |
| Black | 3,166/1,180,680 | 2,447/1,234,646 | 1,769/1,103,947 | 1,223/970,353 | 1,041/984,721 | 904/961,047 | 838/984,771 |
| Hispanic | 502/688,566 | 441/786,299 | 299/696,168 | 229/665,718 | 232/682,055 | 218/662,775 | 235/715,142 |
| API | 86/233,764 | 73/281,162 | 75/303,302 | 69/319,205 | 65/338,524 | 69/348,196 | 68/387,772 |
| Other | 92/98,912 | 56/118,234 | 64/135,030 | 62/147,900 | 72/162,642 | 78/176,515 | 106/187,803 |
| *Age group* |  |  |  |  |  |  |  |
| 67-69 | 1,172/2,877,728 | 1,247/3,191,092 | 1,028/3,097,117 | 1,006/2,878,788 | 1,086/2,935,007 | 1,238/3,464,548 | 1,311/3,477,934 |
| 70-74 | 2,775/5,007,639 | 2,389/4,917,584 | 1,981/4532042 | 1,784/4,227,380 | 1,969/4,331,262 | 2,031/4,439,358 | 2,501/4,928,555 |
| 75-79 | 3,399/4,482,197 | 3,098/4,511,051 | 2,562/4037998 | 1,980/3,457,899 | 2,003/3,343,632 | 2,097/3,325,666 | 2,397/3,486,940 |
| 80-84 | 3,684/3,224,498 | 3,369/3,471,573 | 2,805/3,286,585 | 2,360/2,911,140 | 2,137/2,716,785 | 2,116/2,479,410 | 2,146/2,451,524 |
| 85+ | 6,243/3,199,457 | 5,250/3,362,874 | 4,297/3,386,091 | 3,719/3,320,109 | 3,308/3,367,930 | 3,127/3,236,212 | 2,927/3,124,680 |
| NLEA level |  |  |  |  |  |  |  |
| Toe | 5,845/18,791,519 | 6,251/19,454,174 | 6,029/18,339,833 | 5,911/16,795,316 | 6,294/16,694,614 | 6,664/16,945,193 | 7,106/17,469,632 |
| Foot | 615/18,791,519 | 527/19,454,174 | 439/18,339,833 | 358/16,795,316 | 386/16,694,614 | 446/16,945,193 | 750/17,469,632 |
| BKA | 3,249/18,791,519 | 2,749/19,454,174 | 1,891/18,339,833 | 1,472/16,795,316 | 1,164/16,694,614 | 1,167/16,945,193 | 1,126/17,469,632 |
| AKA | 7,564/18,791,519 | 5,826/19,454,174 | 4,314/18,339,833 | 3,108/16,795,316 | 2,659/16,694,614 | 2,317/16,945,193 | 2,255/17,469,632 |
| AKA: Above the knee amputation; API: Asian/Pacific Islander BKA: Below the knee amputation; FFS: fee-for-service; NLEA: Non-traumatic lower extremity amputation | | | | | | | |
